# Supplementary material
Source: PubMed Central journal article supplement (PMC4075480)
Supplement: NIHMS590084-supplement-1.pdf [file NIHMS590084-supplement-1.pdf]

**SUPPLEMENTARY TABLE I**

| Cell type                                                                                       | Cell number per spleen, WT     | Cell number per spleen, Ast-Tbr2DN |
|-------------------------------------------------------------------------------------------------|--------------------------------|------------------------------------|
| Dendritic cells (CD11b <sup>+</sup> /CD11c <sup>+</sup> /Gr1 <sup>-</sup> /F4/80 <sup>-</sup> ) | 39.02 ± 5.96 x10 <sup>4</sup>  | 34.39 ± 8.85 x10 <sup>4</sup>      |
| Macrophages (CD11b <sup>+</sup> /F4/80 <sup>+</sup> /CD11c <sup>-</sup> /Gr1 <sup>-</sup> )     | 30.81 ± 5.13 x10 <sup>4</sup>  | 30.17 ± 7.45 x10 <sup>4</sup>      |
| Granulocytes (CD11b <sup>+</sup> /Gr1 <sup>+</sup> /CD11c <sup>-</sup> /F4/80 <sup>-</sup> )    | 96.61 ± 24.18 x10 <sup>4</sup> | 104.70 ± 22.57 x10 <sup>4</sup>    |
| CD4 <sup>+</sup> T cells (CD3 <sup>+</sup> /CD4 <sup>+</sup> )                                  | 42.38 ± 9.65 x10 <sup>5</sup>  | 35.30 ± 7.44 x10 <sup>5</sup>      |
| CD8 <sup>+</sup> T cells (CD3 <sup>+</sup> /CD8 <sup>+</sup> )                                  | 25.86 ± 5.87 x10 <sup>5</sup>  | 21.34 ± 4.24 x10 <sup>5</sup>      |
| T regs (CD3 <sup>+</sup> /CD4 <sup>+</sup> /CD25 <sup>+</sup> )                                 | 22.61 ± 5.04 x10 <sup>4</sup>  | 18.55 ± 4.23 x10 <sup>4</sup>      |
| B cells (CD3 <sup>-</sup> /CD19 <sup>+</sup> )                                                  | 24.09 ± 5.04 x10 <sup>6</sup>  | 20.94 ± 4.10 x10 <sup>6</sup>      |

**Supplementary Table I. Uninfected wildtype and Ast-Tbr2DN mice show no difference in baseline leukocyte populations.** Splenocytes isolated from uninfected wildtype (WT) and Ast-Tbr2DN mice were stained as indicated and then analyzed by flow cytometry. *N* = 6 mice/genotype.

## SUPPLEMENTARY TABLE II

### II-A. Serum cytokine and chemokine levels at 2 wpi

| Cytokine or chemokine concentration, (pg/ml serum) | WT                   | Ast-Tbr2DN           |
|----------------------------------------------------|----------------------|----------------------|
| IL-1 $\alpha$                                      | 81.37 $\pm$ 6.70     | 95.89 $\pm$ 8.33     |
| IL-1 $\beta$                                       | 20.33 $\pm$ 2.41     | 17.02 $\pm$ 1.36     |
| IL-2                                               | 7.94 $\pm$ 1.10      | 10.31 $\pm$ 1.50     |
| IL-3                                               | 2.87 $\pm$ 0.49      | 3.41 $\pm$ 1.17      |
| IL-5                                               | 61.41 $\pm$ 27.68    | 39.50 $\pm$ 17.03    |
| IL-12 p40                                          | 81.31 $\pm$ 13.00    | 90.83 $\pm$ 4.69     |
| IL-13                                              | 6.01 $\pm$ 1.60      | 5.64 $\pm$ 1.58      |
| IL-17                                              | 11.83 $\pm$ 3.53     | 9.56 $\pm$ 1.67      |
| IL-23                                              | 13.93 $\pm$ 2.45     | 14.64 $\pm$ 3.94     |
| IFN $\gamma$                                       | 277.42 $\pm$ 64.93   | 247.63 $\pm$ 43.24   |
| CCL2                                               | 32.02 $\pm$ 2.86     | 31.27 $\pm$ 4.01     |
| CCL3                                               | 6.79 $\pm$ 0.90      | 12.76 $\pm$ 2.28     |
| CCL7                                               | 195.93 $\pm$ 14.21   | 222.65 $\pm$ 20.55   |
| CCL11                                              | 1126.98 $\pm$ 157.53 | 1300.96 $\pm$ 140.08 |
| CXCL10                                             | 8.87 $\pm$ 3.77      | 9.56 $\pm$ 1.57      |
| G-CSF                                              | 18.04 $\pm$ 6.84     | 5.69 $\pm$ 1.14      |
| GM-CSF                                             | 10.41 $\pm$ 2.61     | 11.12 $\pm$ 2.36     |
| TNF $\alpha$                                       | 33.78 $\pm$ 4.55     | 43.54 $\pm$ 8.42     |
| VEGF                                               | 17.23 $\pm$ 1.06     | 19.25 $\pm$ 2.08     |

### II-B. Brain cytokine and chemokine levels at 4 wpi

| Cytokine or chemokine concentration (pg/mg protein) | WT                | Ast-Tbr2DN        |
|-----------------------------------------------------|-------------------|-------------------|
| IL-1 $\alpha$                                       | 9.98 $\pm$ 1.50   | 11.69 $\pm$ 2.15  |
| IL-1 $\beta$                                        | 16.26 $\pm$ 1.52  | 19.58 $\pm$ 2.91  |
| IL-2                                                | 1.29 $\pm$ 0.28   | 2.27 $\pm$ 0.41   |
| IL-3                                                | 0.81 $\pm$ 0.12   | 0.91 $\pm$ 0.17   |
| IL-4                                                | 1.04 $\pm$ 0.14   | 1.15 $\pm$ 0.10   |
| IL-5                                                | 20.90 $\pm$ 2.29  | 20.97 $\pm$ 2.56  |
| IL-6                                                | 3.88 $\pm$ 0.79   | 6.09 $\pm$ 1.14   |
| IL-10                                               | 1.36 $\pm$ 0.27   | 1.67 $\pm$ 0.10   |
| IL-12 p40                                           | 99.15 $\pm$ 8.72  | 95.58 $\pm$ 19.32 |
| IL-12p70                                            | 6.82 $\pm$ 0.49   | 6.78 $\pm$ 1.12   |
| IL-13                                               | 1.17 $\pm$ 0.30   | 1.21 $\pm$ 0.26   |
| IL-17                                               | 5.59 $\pm$ 0.29   | 5.35 $\pm$ 0.71   |
| IL-23                                               | 2.44 $\pm$ 0.20   | 2.69 $\pm$ 0.22   |
| IFN $\gamma$                                        | 78.01 $\pm$ 8.02  | 79.19 $\pm$ 9.51  |
| CCL2                                                | 11.43 $\pm$ 1.56  | 13.31 $\pm$ 2.37  |
| CCL3                                                | 9.24 $\pm$ 1.43   | 9.66 $\pm$ 1.57   |
| CCL5                                                | 32.90 $\pm$ 5.89  | 36.99 $\pm$ 5.07  |
| CCL7                                                | 23.05 $\pm$ 5.81  | 26.52 $\pm$ 5.89  |
| CCL11                                               | 9.06 $\pm$ 1.99   | 6.87 $\pm$ 1.11   |
| CXCL1                                               | 3.58 $\pm$ 0.68   | 3.47 $\pm$ 0.70   |
| CXCL10                                              | 39.80 $\pm$ 11.33 | 34.95 $\pm$ 9.02  |
| G-CSF                                               | 0.09 $\pm$ 0.02   | 0.14 $\pm$ 0.03   |
| GM-CSF                                              | 4.16 $\pm$ 0.22   | 4.00 $\pm$ 0.47   |
| TNF $\alpha$                                        | 1.61 $\pm$ 0.19   | 1.81 $\pm$ 0.34   |
| TGF $\beta$                                         | 0.46 $\pm$ 0.05   | 0.32 $\pm$ 0.04   |
| VEGF                                                | 3.89 $\pm$ 0.59   | 3.74 $\pm$ 0.37   |

**Supplementary Table II. Wildtype and Ast-Tbr2DN mice serum cytokine and chemokine levels at 2 wpi, and brain cytokine and chemokine levels at 4 wpi show no differences. A-B.** Samples from wildtype (WT) and Ast-Tbr2DN mice were used to quantify multiple cytokines and chemokines via multiplex assay. N = 6 mice/genotype. For each condition, only those cytokines and chemokines that were detectable are included, levels are mean  $\pm$  SEM *II-A*. Serum, 2 wpi. *II-B*. Brain, 4 wpi.

## SUPPLEMENTARY FIGURE 1

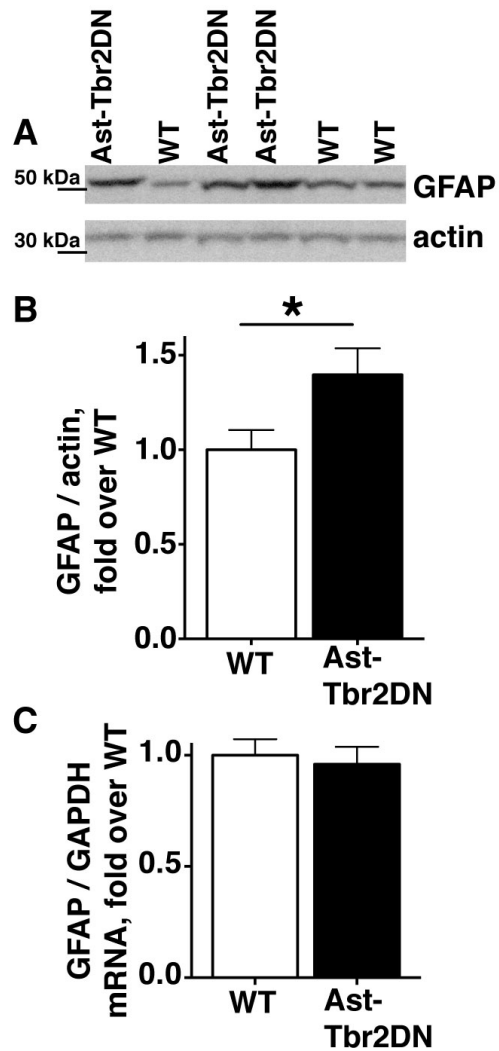

**Supplementary Figure 1. Reduced astrocytic TGF $\beta$  signaling leads to more GFAP protein, but not mRNA production 2 weeks post oral *Toxoplasma* infection. *A, B.* Representative Western blot images (*A*) and quantification (*B*) of GFAP in the cortex of wildtype controls and Ast-Tbr2DN mice 2wpi. *C.* Quantification of GFAP mRNA levels in Ast-Tbr2DN mice and wildtype controls 2wpi. N = 6 mice per genotype. Bars, mean  $\pm$  SEM. \* $P$ <0.05, Student's t test.**

**SUPPLEMENTARY  
FIGURE 2**

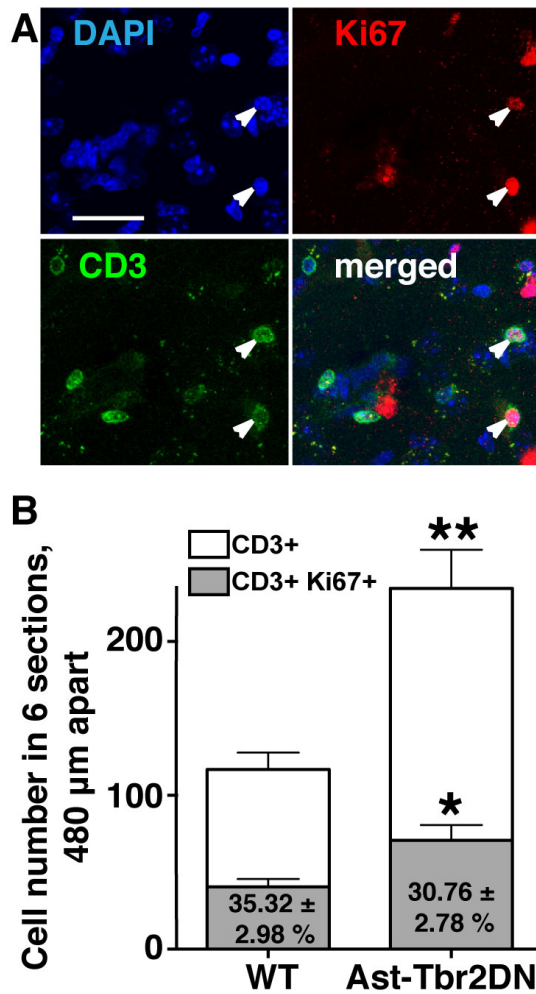

**Supplementary Figure 2. Reduced astrocytic TGF $\beta$  signaling does not affect CD3<sup>+</sup> T cell proliferation during acute *Toxoplasma* infection. *A, B.* Representative images (*A*) and quantification (*B*) of the numbers of CD3<sup>+</sup> T cells that expressed cell proliferation marker Ki67. The percentage of CD3<sup>+</sup> cells that are CD3<sup>+</sup>/Ki67<sup>+</sup> is shown inside the grey bars. N = 5-6 mice per genotype. Bars, mean  $\pm$  SEM. \**P*<0.05, Student's t test to compare absolute numbers of CD3<sup>+</sup> cells and of CD3<sup>+</sup>/Ki67<sup>+</sup> cells between genotypes.**
